# Supplementary material for: Bubble-propelled micromotors for ammonia generation
Source: Royal Society of Chemistry journal article supplement (doi:10.1039/d3nr03804a), 2023-01-01
Supplement: d3nr03804a1.pdf [file d3nr03804a1.pdf]

## Supplementary Information of “Bubble-Propelled Micromotors for Ammonia Generation”

Rebeca Ferrer Campos <sup>a</sup>, Harshith Bachimanchi <sup>b</sup>, Giovanni Volpe <sup>\* b</sup> and Katherine Villa <sup>\*a</sup>

a. Institute of Chemical Research of Catalonia (ICIQ), Av. Països Catalans, 16, Tarragona E-43007, Spain. Email: [kvilla@iciq.es](mailto:kvilla@iciq.es)

b. Department of Physics, University of Gothenburg, Origovägen 6B, Gothenburg 41296, Sweden. Email: [giovanni.volpe@physics.gu.se](mailto:giovanni.volpe@physics.gu.se)

This supplementary information file contains:

Supplementary Figures S1-S8

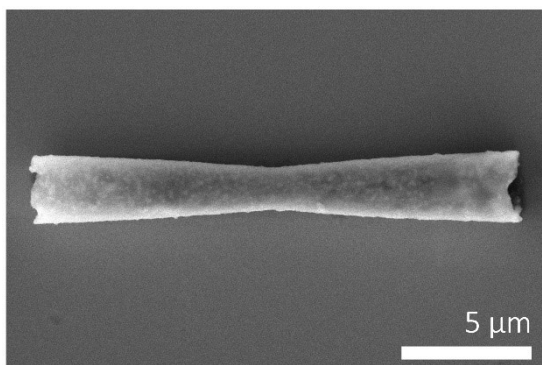

**Figure S1.** High-resolution FESEM image of a silica microtube.

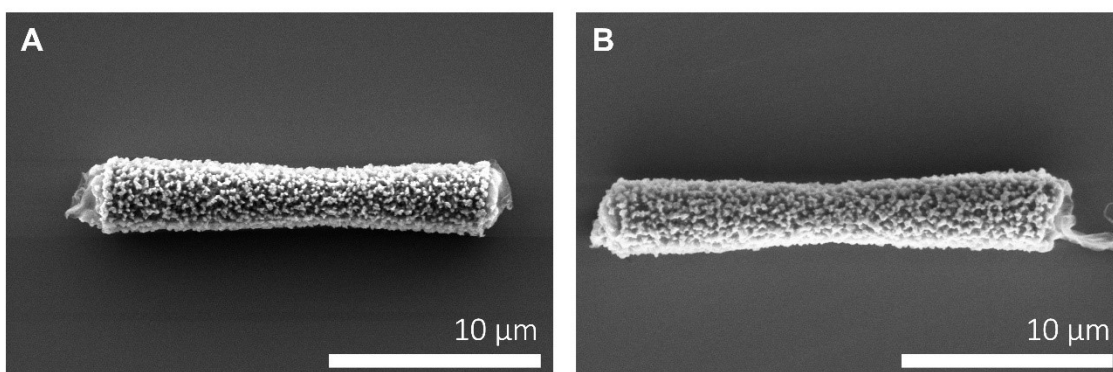

**Figure S2.** High-resolution FESEM images of a MnO<sub>2</sub> micromotor **A)** before and **B)** after the laccase functionalization.

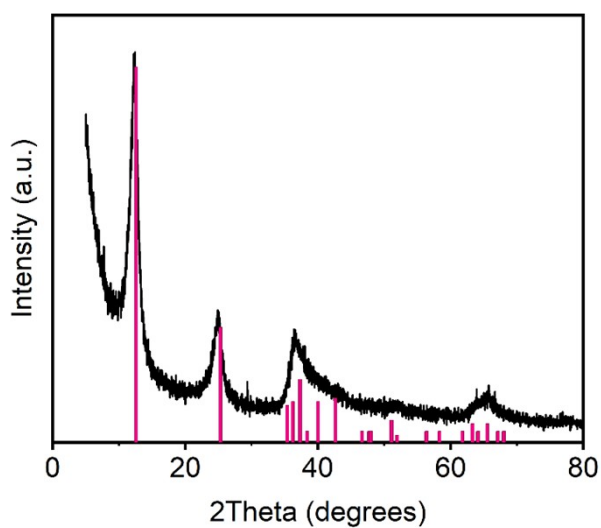

**Figure S3.** XRD of MnO<sub>2</sub> micromotors.

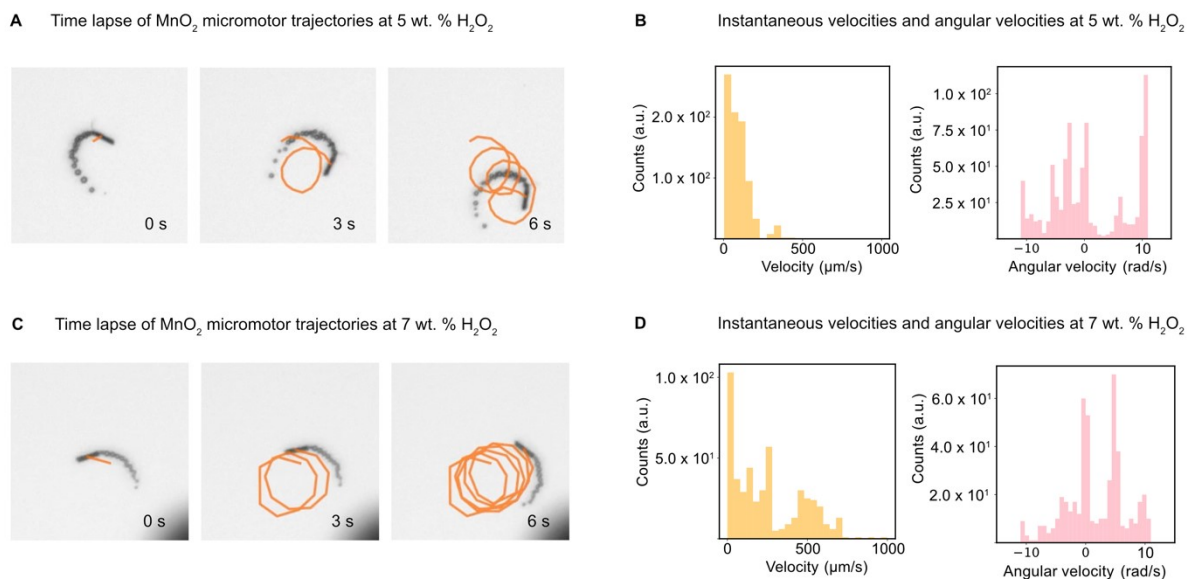

**Figure S4.** Motion characterization of the MnO<sub>2</sub> micromotors at different H<sub>2</sub>O<sub>2</sub> concentrations. **A)** MnO<sub>2</sub> micromotors trajectories with 5% (w/w) H<sub>2</sub>O<sub>2</sub>. **B)** Velocities and angular velocities for the 5% (w/w) H<sub>2</sub>O<sub>2</sub> collection of trajectories. **C)** MnO<sub>2</sub> micromotors trajectories with 7% (w/w) H<sub>2</sub>O<sub>2</sub>. **D)** Velocities and angular velocities for the 7% (w/w) H<sub>2</sub>O<sub>2</sub> collection of trajectories.

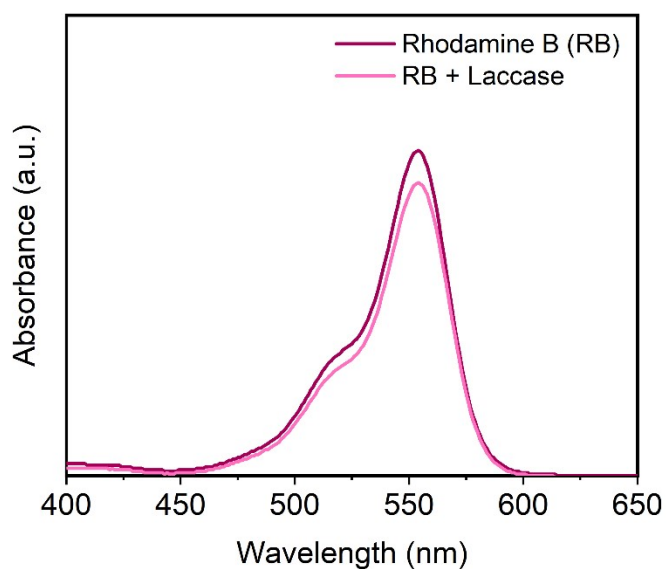

**Figure S5.** UV-vis spectra of RB with free laccase after 3h of reaction.

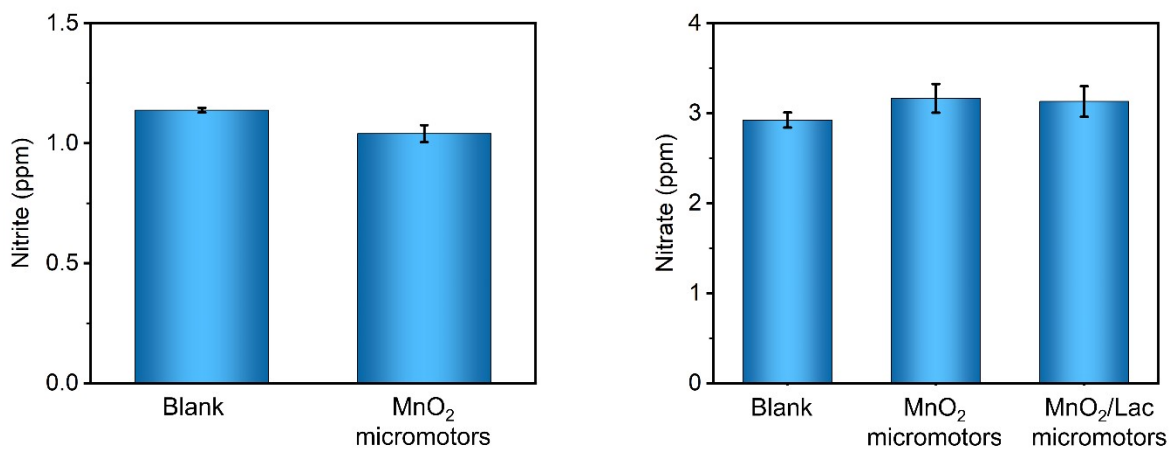

**Figure S6.** Ion chromatography results for the concentrations of **A)** nitrite and **B)** nitrate ions.

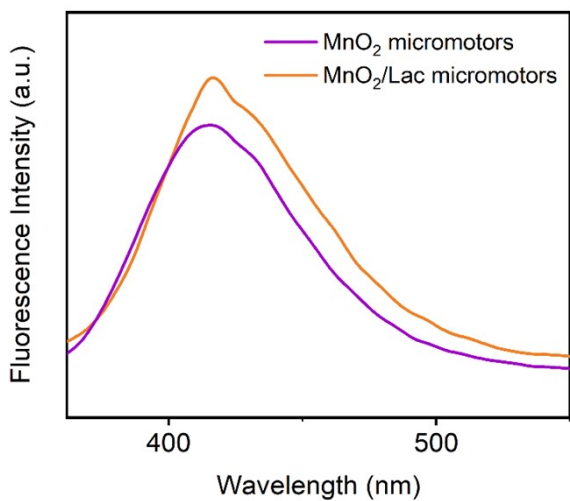

**Figure S7.** Fluorescence spectra of the terephthalate monohydroxylate isomer generated with MnO<sub>2</sub> and MnO<sub>2</sub>/Lac micromotors at 15 min reaction time.

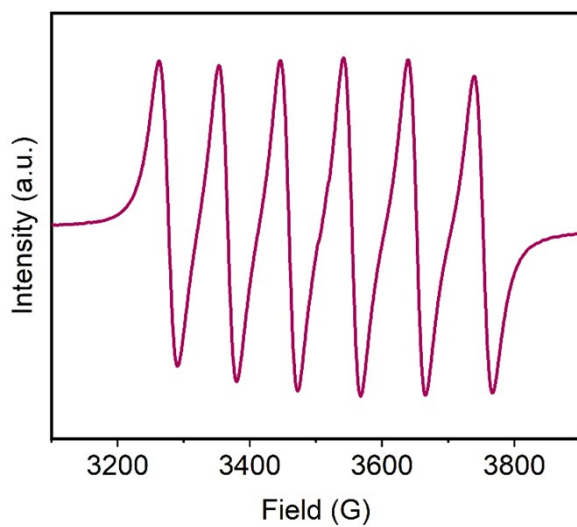

**Figure S8.** EPR spectrum of the MnO<sub>2</sub> micromotors.
